# Supplementary material for: Method validation for the analysis of licorice acid in the blending process by near infrared diffuse reflectance spectroscopy
Source: Royal Society of Chemistry journal article supplement (doi:10.1039/c5ay01289a), 2015-01-01
Supplement: c5ay01289a1.pdf [file c5ay01289a1.pdf]

### Supplementary Information

After spectral preprocessing, the interval partial least squares (iPLS) and the synergy interval partial least square (SiPLS) algorithms were used to perform the variables selection for extracting useful information and improving the model performance. The optimal wavebands were assigned according to the lowest value of the root mean squared error cross validation (RMSECV). The results are shown in

**Table S1.**

**Table S1** variables selection results for NIR spectrum

| Intervals<br>numbers | RMSECV        |               |               |
|----------------------|---------------|---------------|---------------|
|                      | SiPLS         |               | iPLS          |
|                      | Combination=3 | Combination=2 |               |
| 5                    | 0.1258        | 0.1249        | 0.1244        |
| 6                    | 0.1233        | 0.1201        | 0.1206        |
| 7                    | 0.1244        | 0.1219        | 0.1205        |
| 8                    | 0.1252        | 0.1242        | 0.1227        |
| 9                    | 0.1235        | 0.1230        | 0.1221        |
| 10                   | 0.1234        | 0.1218        | 0.1222        |
| 11                   | 0.1220        | 0.1226        | 0.1222        |
| 12                   | 0.1031        | 0.0929        | 0.1238        |
| 13                   | 0.1191        | 0.1187        | 0.1290        |
| 14                   | 0.1033        | 0.1204        | 0.1279        |
| 15                   | 0.1218        | 0.1225        | 0.1264        |
| 16                   | 0.1194        | 0.1227        | 0.1270        |
| 17                   | 0.1775        | 0.1163        | <b>0.1170</b> |
| 18                   | 0.1169        | 0.1200        | 0.1179        |
| 19                   | 0.1183        | 0.1215        | 0.1256        |
| 20                   | 0.1188        | 0.1222        | 0.1249        |
| 21                   | 0.1048        | 0.1222        | 0.1254        |
| 22                   | 0.1142        | 0.1222        | 0.1264        |
| 23                   | 0.1084        | 0.1230        | 0.1272        |
| 24                   | 0.1195        | 0.1185        | 0.1280        |
| 25                   | 0.1137        | 0.1209        | 0.1276        |
| 26                   | 0.1066        | 0.1207        | 0.1278        |
| 27                   | 0.1152        | 0.1202        | 0.1274        |
| 28                   | 0.1069        | 0.1172        | 0.1280        |
| 29                   | 0.1068        | 0.1256        | 0.1284        |
| 30                   | 0.1214        | 0.1257        | 0.1269        |

|    |               |        |        |
|----|---------------|--------|--------|
| 31 | 0.1201        | 0.1249 | 0.1278 |
| 32 | 0.0931        | 0.1188 | 0.1179 |
| 33 | 0.0965        | 0.1184 | 0.1199 |
| 34 | 0.1159        | 0.1170 | 0.1207 |
| 35 | <b>0.0827</b> | 0.1189 | 0.1265 |
| 36 | 0.0999        | 0.1173 | 0.1212 |
| 37 | 0.1026        | 0.1176 | 0.1266 |
| 38 | 0.1183        | 0.1228 | 0.1278 |
| 39 | 0.1092        | 0.1228 | 0.1271 |
| 40 | 0.1062        | 0.1237 | 0.1250 |

The results after different variables selection methods are shown in **Table S2**.

They indicated that the PLS model without any variables selection showed the best calibration and validation performance.

**Table S2** Results for different variables selection methods after 1std+S-G preprocessing

| Method | LVs | $r_{cal}$ | RMSEC | RMSECV | BIAS <sub>cal</sub> | $r_{val}$ | RMSEP | RPD  | BIAS <sub>val</sub> |
|--------|-----|-----------|-------|--------|---------------------|-----------|-------|------|---------------------|
| PLS    | 5   | 0.9959    | 0.066 | 0.160  | 0.053               | 0.9492    | 0.137 | 3.10 | 0.101               |
| SiPLS  | 4   | 0.9865    | 0.120 | 0.155  | 0.091               | 0.9239    | 0.173 | 2.46 | 0.149               |
| iPLS   | 5   | 0.9906    | 0.100 | 0.119  | 0.076               | 0.9403    | 0.147 | 2.89 | 0.109               |
